# Supplementary material for: Comparative analysis of the complete plastomes of nine Pimpinella species (Apiaceae) from China
Source: PeerJ. 2023 Feb 28;11:e14773. doi: 10.7717/peerj.14773 (PMC9983424; doi:10.7717/peerj.14773)
Supplement: Table S1 [file peerj-11-14773-s001.xlsx]

## Sheet: Sheet1
Table S1 The number and RSCU values of 64 codons in the nine Pimpinella species.
Amino Acids	Codons	P. candolleana		P. diversifolia		P. rubescens		P. scaberula		P. thellungiana		P. smithii		P. valleculosa		P. rhomboidea		P. purpurea
		Number	RSCU	Number	RSCU	Number	RSCU	Number	RSCU	Number	RSCU	Number	RSCU	Number	RSCU	Number	RSCU	Number	RSCU
Ala	GCU	520	1.76	518	1.75	521	1.76	522	1.77	528	1.78	526	1.79	527	1.8	515	1.75	523	1.76
	GCC	200	0.68	200	0.68	197	0.67	196	0.66	198	0.67	185	0.63	185	0.63	199	0.68	202	0.68
	GCA	327	1.1	326	1.1	327	1.11	328	1.11	327	1.1	323	1.1	323	1.1	327	1.11	327	1.1
	GCG	138	0.47	137	0.46	137	0.46	136	0.46	136	0.46	139	0.47	135	0.46	136	0.46	134	0.45
Arg	CGU	275	1.31	274	1.31	274	1.32	273	1.31	277	1.32	282	1.35	280	1.35	281	1.35	280	1.34
	CGC	81	0.39	81	0.39	84	0.4	83	0.4	81	0.39	80	0.38	81	0.39	81	0.39	82	0.39
	CGA	284	1.35	284	1.36	283	1.36	283	1.36	288	1.38	288	1.38	284	1.37	282	1.36	289	1.38
	CGG	105	0.5	105	0.5	102	0.49	104	0.5	105	0.5	99	0.47	96	0.46	101	0.49	106	0.51
	AGA	385	1.83	384	1.83	381	1.83	380	1.83	382	1.82	375	1.8	375	1.81	375	1.8	375	1.79
	AGG	129	0.61	129	0.62	126	0.6	126	0.61	123	0.59	127	0.61	125	0.6	128	0.62	124	0.59
Asn	AAU	761	1.52	762	1.53	763	1.53	761	1.53	749	1.51	754	1.52	755	1.52	755	1.51	756	1.51
	AAC	238	0.48	237	0.47	234	0.47	234	0.47	240	0.49	236	0.48	240	0.48	245	0.49	248	0.49
Asp	GAU	682	1.6	678	1.59	671	1.58	678	1.59	677	1.59	683	1.6	681	1.6	681	1.6	677	1.61
	GAC	171	0.4	173	0.41	177	0.42	175	0.41	173	0.41	169	0.4	171	0.4	171	0.4	165	0.39
Cys	UGU	170	1.54	171	1.54	172	1.55	173	1.55	170	1.55	166	1.52	167	1.53	170	1.55	173	1.56
	UGC	51	0.46	51	0.46	50	0.45	50	0.45	49	0.45	52	0.48	51	0.47	49	0.45	49	0.44
Gln	CAA	582	1.51	583	1.51	577	1.51	580	1.51	583	1.51	573	1.5	577	1.51	576	1.51	571	1.51
	CAG	188	0.49	187	0.49	187	0.49	187	0.49	189	0.49	189	0.5	187	0.49	188	0.49	187	0.49
Glu	GAA	811	1.49	812	1.49	817	1.49	815	1.49	810	1.48	825	1.51	827	1.51	820	1.5	827	1.5
	GAG	281	0.51	281	0.51	278	0.51	278	0.51	283	0.52	268	0.49	266	0.49	273	0.5	279	0.5
Gly	GGU	504	1.35	504	1.35	503	1.35	505	1.35	505	1.35	502	1.35	499	1.34	500	1.34	497	1.32
	GGC	174	0.47	174	0.47	174	0.47	171	0.46	168	0.45	169	0.45	172	0.46	174	0.47	175	0.47
	GGA	562	1.5	562	1.5	561	1.5	560	1.5	563	1.51	563	1.51	559	1.5	571	1.53	569	1.52
	GGG	255	0.68	255	0.68	255	0.68	257	0.69	257	0.69	254	0.68	258	0.69	247	0.66	260	0.69
His	CAU	390	1.51	390	1.51	387	1.51	389	1.5	389	1.52	385	1.52	389	1.51	392	1.53	381	1.49
	CAC	125	0.49	126	0.49	126	0.49	128	0.5	122	0.48	123	0.48	126	0.49	121	0.47	129	0.51
Ile	AUU	860	1.45	861	1.45	858	1.44	856	1.43	860	1.44	872	1.45	868	1.43	857	1.43	854	1.43
	AUC	334	0.56	336	0.57	334	0.56	337	0.56	340	0.57	337	0.56	342	0.56	342	0.57	342	0.57
	AUA	588	0.99	587	0.99	601	1.01	603	1.01	586	0.98	601	1	608	1	602	1	591	0.99
Leu	UUA	738	1.98	734	1.97	744	2	745	2	747	2	748	2.01	747	2.01	740	2	725	1.96
	UUG	442	1.19	443	1.19	442	1.19	444	1.19	441	1.18	435	1.17	442	1.19	444	1.2	444	1.2
	CUU	476	1.28	477	1.28	482	1.29	482	1.29	478	1.28	470	1.26	470	1.26	469	1.27	472	1.28
	CUC	145	0.39	145	0.39	139	0.37	142	0.38	149	0.4	144	0.39	143	0.38	136	0.37	141	0.38
	CUA	303	0.81	304	0.82	301	0.81	300	0.8	299	0.8	295	0.79	300	0.81	303	0.82	293	0.79
	CUG	129	0.35	131	0.35	127	0.34	126	0.34	130	0.35	139	0.37	132	0.35	130	0.35	140	0.38
Lys	AAA	839	1.52	840	1.52	843	1.53	847	1.53	839	1.51	846	1.52	846	1.51	844	1.52	843	1.54
	AAG	265	0.48	266	0.48	262	0.47	259	0.47	270	0.49	266	0.48	276	0.49	264	0.48	255	0.46
Met	AUG	482	1	481	1	483	1	482	1	480	1	482	1	481	1	488	1	484	1
Phe	UUU	820	1.36	819	1.36	815	1.35	817	1.36	817	1.36	809	1.35	809	1.36	809	1.35	804	1.34
	UUC	387	0.64	388	0.64	389	0.65	388	0.64	386	0.64	389	0.65	385	0.64	387	0.65	397	0.66
Pro	CCU	348	1.58	348	1.58	348	1.58	347	1.57	348	1.57	347	1.57	353	1.59	359	1.62	337	1.52
	CCC	172	0.78	172	0.78	172	0.78	173	0.78	173	0.78	163	0.74	163	0.74	163	0.74	179	0.81
	CCA	229	1.04	229	1.04	228	1.03	227	1.03	231	1.04	236	1.07	233	1.05	231	1.04	233	1.05
	CCG	134	0.61	134	0.61	135	0.61	137	0.62	136	0.61	140	0.63	138	0.62	133	0.6	137	0.62
Ser	UCU	449	1.71	448	1.7	447	1.71	445	1.7	445	1.69	440	1.69	445	1.7	451	1.72	454	1.74
	UCC	240	0.91	240	0.91	240	0.92	240	0.92	250	0.95	250	0.96	248	0.95	249	0.95	244	0.93
	UCA	297	1.13	299	1.14	299	1.14	299	1.14	296	1.13	293	1.12	297	1.14	304	1.16	297	1.14
	UCG	177	0.67	177	0.67	171	0.65	174	0.66	171	0.65	170	0.65	169	0.65	161	0.61	158	0.6
	AGU	324	1.23	323	1.23	323	1.23	324	1.24	326	1.24	324	1.24	321	1.23	321	1.22	328	1.26
	AGC	89	0.34	90	0.34	91	0.35	91	0.35	88	0.34	89	0.34	88	0.34	88	0.34	87	0.33
Thr	ACU	453	1.64	452	1.64	452	1.64	454	1.64	451	1.63	451	1.64	450	1.63	434	1.58	430	1.56
	ACC	203	0.73	203	0.74	204	0.74	203	0.74	200	0.72	202	0.74	206	0.75	207	0.75	214	0.78
	ACA	328	1.19	327	1.19	330	1.2	327	1.18	325	1.18	324	1.18	326	1.18	332	1.21	328	1.19
	ACG	121	0.44	121	0.44	118	0.43	120	0.43	130	0.47	122	0.44	123	0.45	128	0.47	131	0.48
Trp	UGG	378	1	379	1	378	1	376	1	377	1	379	1	375	1	381	1	382	1
Tyr	UAU	645	1.6	645	1.6	647	1.6	650	1.6	649	1.59	652	1.6	650	1.6	655	1.61	651	1.61
	UAC	163	0.4	163	0.4	163	0.4	164	0.4	165	0.41	165	0.4	162	0.4	159	0.39	158	0.39
Val	GUU	440	1.5	438	1.49	440	1.51	442	1.51	443	1.52	440	1.5	445	1.51	444	1.53	440	1.5
	GUC	134	0.46	134	0.46	130	0.45	128	0.44	130	0.45	140	0.48	135	0.46	138	0.47	138	0.47
	GUA	426	1.45	427	1.46	424	1.45	426	1.46	422	1.45	426	1.45	426	1.45	412	1.42	417	1.43
	GUG	172	0.59	173	0.59	172	0.59	172	0.59	169	0.58	170	0.58	170	0.58	169	0.58	175	0.6
TER	UAA	27	1.53	27	1.53	29	1.64	27	1.53	27	1.53	29	1.64	30	1.7	27	1.53	27	1.53
	UAG	15	0.85	15	0.85	13	0.74	15	0.85	15	0.85	13	0.74	12	0.68	13	0.74	12	0.68
	UGA	11	0.62	11	0.62	11	0.62	11	0.62	11	0.62	11	0.62	11	0.62	13	0.74	14	0.79
In Total	64	21172	64	21171	64.02	21149	64.02	21172	64.01	21172	64.01	21144	63.99	21161	63.97	21145	64.04	21141	63.98
