# Supplementary material for: Comparative analysis of the complete plastomes of nine Pimpinella species (Apiaceae) from China
Source: PeerJ. 2023 Feb 28;11:e14773. doi: 10.7717/peerj.14773 (PMC9983424; doi:10.7717/peerj.14773)
Supplement: Table S2 [file peerj-11-14773-s002.xlsx]

## Sheet: Sheet1
Table S2 The RNA editing sites analysis
P. candolleana	Gene	Nt Pos	AA Pos	Align Col	Effect	Score	Total
	accD	74	25	26	ACG (T) => ATG (M)	1	57
		785	262	288	TCG (S) => TTG (L)	0.8
		1186	396	434	CCA (P) => TCA (S)	1
		1394	465	503	CCT (P) => CTT (L)	1
	atpA	791	264	264	CCC (P) => CTC (L)	1
	atpB	1487	496	496	TCG (S) => TTG (L)	1
	matK	634	212	229	CAT (H) => TAT (Y)	1
		985	329	346	CTT (L) => TTT (F)	0.86
		1007	336	353	GCG (A) => GTG (V)	0.86
	ndhA	107	36	36	CCT (P) => CTT (L)	1
		320	107	107	ACA (T) => ATA (I)	1
		1073	358	358	TCC (S) => TTC (F)	1
	ndhB	149	50	50	TCA (S) => TTA (L)	1
		467	156	156	CCA (P) => CTA (L)	1
		586	196	196	CAT (H) => TAT (Y)	1
		611	204	204	TCA (S) => TTA (L)	0.8
		737	246	246	CCA (P) => CTA (L)	1
		746	249	249	TCT (S) => TTT (F)	1
		830	277	277	TCA (S) => TTA (L)	1
		836	279	279	TCA (S) => TTA (L)	1
		902	301	301	ACC (T) => ATC (I)	1
		1481	494	494	CCA (P) => CTA (L)	1
	ndhD	2	1	1	ACG (T) => ATG (M)	1
		674	225	225	TCG (S) => TTG (L)	1
		878	293	293	TCA (S) => TTA (L)	1
		1258	420	420	CTT (L) => TTT (F)	1
		1298	433	433	TCA (S) => TTA (L)	0.8
	ndhF	290	97	97	TCA (S) => TTA (L)	1
		2200	734	743	CTT (L) => TTT (F)	1
	ndhG	166	56	56	CAT (H) => TAT (Y)	0.8
		314	105	105	ACA (T) => ATA (I)	0.8
	petB	418	140	140	CGG (R) => TGG (W)	1
		611	204	204	CCA (P) => CTA (L)	1
	petG	104	35	35	TCG (S) => TTG (L)	1
	psaI	104	35	51	ACT (T) => ATT (I)	1
	psbE	214	72	72	CCT (P) => TCT (S)	1
	psbF	77	26	26	TCT (S) => TTT (F)	1
	rpl20	308	103	103	TCA (S) => TTA (L)	0.86
	rpoB	338	113	113	TCT (S) => TTT (F)	1
		551	184	185	TCA (S) => TTA (L)	1
		566	189	190	TCG (S) => TTG (L)	1
		1450	484	501	CCT (P) => TCT (S)	1
		2000	667	684	TCT (S) => TTT (F)	1
		2426	809	827	TCA (S) => TTA (L)	0.86
	rpoC1	41	14	14	TCA (S) => TTA (L)	1
		1447	483	500	CGT (R) => TGT (C)	1
	rpoC2	806	269	280	ACT (T) => ATT (I)	0.86
		1444	482	499	CGC (R) => TGC (C)	0.86
		1897	633	817	CCA (P) => TCA (S)	1
		2278	760	948	CGG (R) => TGG (W)	1
		2285	762	953	ACA (T) => ATA (I)	0.83
		2617	873	1064	CCC (P) => TCC (S)	0.86
		2960	987	1186	ACT (T) => ATT (I)	1
		3527	1176	1385	ACT (T) => ATT (I)	0.86
	rps2	676	226	226	CGT (R) => TGT (C)	0.86
	rps14	80	27	27	TCA (S) => TTA (L)	1
		149	50	53	CCG (P) => CTG (L)	1
P. diversifolia	Gene	Nt Pos	AA Pos	Align Col	Effect	Score	Total
	accD	74	25	26	ACG (T) => ATG (M)	1	57
		785	262	288	TCG (S) => TTG (L)	0.8
		1186	396	434	CCA (P) => TCA (S)	1
		1394	465	503	CCT (P) => CTT (L)	1
	atpA	791	264	264	CCC (P) => CTC (L)	1
	atpB	1487	496	496	TCG (S) => TTG (L)	1
	matK	634	212	229	CAT (H) => TAT (Y)	1
		985	329	346	CTT (L) => TTT (F)	0.86
		1007	336	353	GCG (A) => GTG (V)	0.86
	ndhA	107	36	36	CCT (P) => CTT (L)	1
		320	107	107	ACA (T) => ATA (I)	1
		1073	358	358	TCC (S) => TTC (F)	1
	ndhB	149	50	50	TCA (S) => TTA (L)	1
		467	156	156	CCA (P) => CTA (L)	1
		586	196	196	CAT (H) => TAT (Y)	1
		611	204	204	TCA (S) => TTA (L)	0.8
		737	246	246	CCA (P) => CTA (L)	1
		746	249	249	TCT (S) => TTT (F)	1
		830	277	277	TCA (S) => TTA (L)	1
		836	279	279	TCA (S) => TTA (L)	1
		902	301	301	ACC (T) => ATC (I)	1
		1481	494	494	CCA (P) => CTA (L)	1
	ndhD	2	1	1	ACG (T) => ATG (M)	1
		674	225	225	TCG (S) => TTG (L)	1
		878	293	293	TCA (S) => TTA (L)	1
		1258	420	420	CTT (L) => TTT (F)	1
		1298	433	433	TCA (S) => TTA (L)	0.8
	ndhF	290	97	97	TCA (S) => TTA (L)	1
		2200	734	743	CTT (L) => TTT (F)	1
	ndhG	166	56	56	CAT (H) => TAT (Y)	0.8
		314	105	105	ACA (T) => ATA (I)	0.8
	petB	418	140	140	CGG (R) => TGG (W)	1
		611	204	204	CCA (P) => CTA (L)	1
	petG	104	35	35	TCG (S) => TTG (L)	1
	psaI	104	35	51	ACT (T) => ATT (I)	1
	psbE	214	72	72	CCT (P) => TCT (S)	1
	psbF	77	26	26	TCT (S) => TTT (F)	1
	rpl20	308	103	103	TCA (S) => TTA (L)	0.86
	rpoB	338	113	113	TCT (S) => TTT (F)	1
		551	184	185	TCA (S) => TTA (L)	1
		566	189	190	TCG (S) => TTG (L)	1
		1450	484	501	CCT (P) => TCT (S)	1
		2000	667	684	TCT (S) => TTT (F)	1
		2426	809	827	TCA (S) => TTA (L)	0.86
	rpoC1	41	14	14	TCA (S) => TTA (L)	1
		1447	483	500	CGT (R) => TGT (C)	1
	rpoC2	806	269	280	ACT (T) => ATT (I)	0.86
		1444	482	499	CGC (R) => TGC (C)	0.86
		1897	633	817	CCA (P) => TCA (S)	1
		2278	760	948	CGG (R) => TGG (W)	1
		2285	762	953	ACA (T) => ATA (I)	0.83
		2617	873	1064	CCC (P) => TCC (S)	0.86
		2960	987	1186	ACT (T) => ATT (I)	1
		3527	1176	1385	ACT (T) => ATT (I)	0.86
	rps2	676	226	226	CGT (R) => TGT (C)	0.86
	rps14	80	27	27	TCA (S) => TTA (L)	1
		149	50	53	CCG (P) => CTG (L)	1
P. rubescens	Gene	Nt Pos	AA Pos	Align Col	Effect	Score	Total
	accD	74	25	26	ACG (T) => ATG (M)	1	57
		785	262	288	TCG (S) => TTG (L)	0.8
		1186	396	434	CCA (P) => TCA (S)	1
		1394	465	503	CCT (P) => CTT (L)	1
	atpA	791	264	264	CCC (P) => CTC (L)	1
	atpB	1487	496	496	TCG (S) => TTG (L)	1
	matK	640	214	229	CAT (H) => TAT (Y)	1
		991	331	346	CTT (L) => TTT (F)	0.86
		1013	338	353	GCG (A) => GTG (V)	0.86
	ndhA	107	36	36	CCT (P) => CTT (L)	1
		320	107	107	ACA (T) => ATA (I)	1
		1073	358	358	TCC (S) => TTC (F)	1
	ndhB	149	50	50	TCA (S) => TTA (L)	1
		467	156	156	CCA (P) => CTA (L)	1
		586	196	196	CAT (H) => TAT (Y)	1
		611	204	204	TCA (S) => TTA (L)	0.8
		737	246	246	CCA (P) => CTA (L)	1
		746	249	249	TCT (S) => TTT (F)	1
		830	277	277	TCA (S) => TTA (L)	1
		836	279	279	TCA (S) => TTA (L)	1
		902	301	301	ACC (T) => ATC (I)	1
		1481	494	494	CCA (P) => CTA (L)	1
	ndhD	2	1	1	ACG (T) => ATG (M)	1
		674	225	225	TCG (S) => TTG (L)	1
		878	293	293	TCA (S) => TTA (L)	1
		1258	420	420	CTT (L) => TTT (F)	1
		1298	433	433	TCA (S) => TTA (L)	0.8
	ndhF	290	97	97	TCA (S) => TTA (L)	1
		2200	734	743	CTT (L) => TTT (F)	1
	ndhG	166	56	56	CAT (H) => TAT (Y)	0.8
		314	105	105	ACA (T) => ATA (I)	0.8
	petB	418	140	140	CGG (R) => TGG (W)	1
		611	204	204	CCA (P) => CTA (L)	1
	petG	104	35	35	TCG (S) => TTG (L)	1
	psaI	104	35	51	ACT (T) => ATT (I)	1
	psbE	214	72	72	CCT (P) => TCT (S)	1
	psbF	77	26	26	TCT (S) => TTT (F)	1
	rpl20	308	103	103	TCA (S) => TTA (L)	0.86
	rpoA	833	278	280	TCA (S) => TTA (L)	1
	rpoB	338	113	113	TCT (S) => TTT (F)	1
		551	184	185	TCA (S) => TTA (L)	1
		566	189	190	TCG (S) => TTG (L)	1
		1450	484	501	CCT (P) => TCT (S)	1
		2000	667	684	TCT (S) => TTT (F)	1
		2426	809	827	TCA (S) => TTA (L)	0.86
	rpoC1	41	14	14	TCA (S) => TTA (L)	1
		1447	483	500	CGT (R) => TGT (C)	1
	rpoC2	806	269	280	ACT (T) => ATT (I)	0.86
		1444	482	499	CGC (R) => TGC (C)	0.86
		1897	633	817	CCA (P) => TCA (S)	1
		2278	760	948	CGG (R) => TGG (W)	1
		2614	872	1064	CCC (P) => TCC (S)	0.86
		2957	986	1186	ACT (T) => ATT (I)	1
		3524	1175	1385	ACT (T) => ATT (I)	0.86
	rps2	676	226	226	CGT (R) => TGT (C)	0.86
	rps14	80	27	27	TCA (S) => TTA (L)	1
		149	50	53	CCG (P) => CTG (L)	1
P. scaberula	Gene	Nt Pos	AA Pos	Align Col	Effect	Score	Total
	accD	74	25	26	ACG (T) => ATG (M)	1	57
		785	262	288	TCG (S) => TTG (L)	0.8
		1186	396	434	CCA (P) => TCA (S)	1
		1394	465	503	CCT (P) => CTT (L)	1
	atpA	791	264	264	CCC (P) => CTC (L)	1
	atpB	1487	496	496	TCG (S) => TTG (L)	1
	matK	640	214	229	CAT (H) => TAT (Y)	1
		991	331	346	CTT (L) => TTT (F)	0.86
		1013	338	353	GCG (A) => GTG (V)	0.86
	ndhA	107	36	36	CCT (P) => CTT (L)	1
		320	107	107	ACA (T) => ATA (I)	1
		1073	358	358	TCC (S) => TTC (F)	1
	ndhB	149	50	50	TCA (S) => TTA (L)	1
		467	156	156	CCA (P) => CTA (L)	1
		586	196	196	CAT (H) => TAT (Y)	1
		611	204	204	TCA (S) => TTA (L)	0.8
		737	246	246	CCA (P) => CTA (L)	1
		746	249	249	TCT (S) => TTT (F)	1
		830	277	277	TCA (S) => TTA (L)	1
		836	279	279	TCA (S) => TTA (L)	1
		902	301	301	ACC (T) => ATC (I)	1
		1481	494	494	CCA (P) => CTA (L)	1
	ndhD	2	1	1	ACG (T) => ATG (M)	1
		674	225	225	TCG (S) => TTG (L)	1
		878	293	293	TCA (S) => TTA (L)	1
		1258	420	420	CTT (L) => TTT (F)	1
		1298	433	433	TCA (S) => TTA (L)	0.8
	ndhF	290	97	97	TCA (S) => TTA (L)	1
		2200	734	743	CTT (L) => TTT (F)	1
	ndhG	166	56	56	CAT (H) => TAT (Y)	0.8
		314	105	105	ACA (T) => ATA (I)	0.8
	petB	418	140	140	CGG (R) => TGG (W)	1
		611	204	204	CCA (P) => CTA (L)	1
	petG	104	35	35	TCG (S) => TTG (L)	1
	psaI	104	35	51	ACT (T) => ATT (I)	1
	psbE	214	72	72	CCT (P) => TCT (S)	1
	psbF	77	26	26	TCT (S) => TTT (F)	1
	rpl20	308	103	103	TCA (S) => TTA (L)	0.86
	rpoA	833	278	280	TCA (S) => TTA (L)	1
	rpoB	338	113	113	TCT (S) => TTT (F)	1
		551	184	185	TCA (S) => TTA (L)	1
		566	189	190	TCG (S) => TTG (L)	1
		1450	484	501	CCT (P) => TCT (S)	1
		2000	667	684	TCT (S) => TTT (F)	1
		2426	809	827	TCA (S) => TTA (L)	0.86
	rpoC1	41	14	14	TCA (S) => TTA (L)	1
		1447	483	500	CGT (R) => TGT (C)	1
	rpoC2	806	269	280	ACT (T) => ATT (I)	0.86
		1444	482	499	CGC (R) => TGC (C)	0.86
		1897	633	817	CCA (P) => TCA (S)	1
		2278	760	948	CGG (R) => TGG (W)	1
		2614	872	1064	CCC (P) => TCC (S)	0.86
		2957	986	1186	ACT (T) => ATT (I)	1
		3524	1175	1385	ACT (T) => ATT (I)	0.86
	rps2	676	226	226	CGT (R) => TGT (C)	0.86
	rps14	80	27	27	TCA (S) => TTA (L)	1
		149	50	53	CCG (P) => CTG (L)	1
P. thellungiana	Gene	Nt Pos	AA Pos	Align Col	Effect	Score	Total
	accD	74	25	26	ACG (T) => ATG (M)	1	58
		785	262	288	TCG (S) => TTG (L)	0.8
		1186	396	434	CCA (P) => TCA (S)	1
		1394	465	503	CCT (P) => CTT (L)	1
	atpA	791	264	264	CCC (P) => CTC (L)	1
	atpB	35	12	12	GCT (A) => GTT (V)	0.86
		1487	496	496	TCG (S) => TTG (L)	1
	matK	646	216	229	CAT (H) => TAT (Y)	1
		997	333	346	CTT (L) => TTT (F)	0.86
		1019	340	353	GCG (A) => GTG (V)	0.86
	ndhA	107	36	36	CCT (P) => CTT (L)	1
		320	107	107	ACA (T) => ATA (I)	1
		1073	358	358	TCC (S) => TTC (F)	1
	ndhB	149	50	50	TCA (S) => TTA (L)	1
		467	156	156	CCA (P) => CTA (L)	1
		586	196	196	CAT (H) => TAT (Y)	1
		611	204	204	TCA (S) => TTA (L)	0.8
		737	246	246	CCA (P) => CTA (L)	1
		746	249	249	TCT (S) => TTT (F)	1
		830	277	277	TCA (S) => TTA (L)	1
		836	279	279	TCA (S) => TTA (L)	1
		902	301	301	ACC (T) => ATC (I)	1
		1481	494	494	CCA (P) => CTA (L)	1
	ndhD	2	1	1	ACG (T) => ATG (M)	1
		674	225	225	TCG (S) => TTG (L)	1
		878	293	293	TCA (S) => TTA (L)	1
		1258	420	420	CTT (L) => TTT (F)	1
		1298	433	433	TCA (S) => TTA (L)	0.8
	ndhF	290	97	97	TCA (S) => TTA (L)	1
		2209	737	743	CTT (L) => TTT (F)	1
	ndhG	166	56	56	CAT (H) => TAT (Y)	0.8
		314	105	105	ACA (T) => ATA (I)	0.8
	petB	418	140	140	CGG (R) => TGG (W)	1
		611	204	204	CCA (P) => CTA (L)	1
	petG	104	35	35	TCG (S) => TTG (L)	1
	psaI	104	35	51	ACT (T) => ATT (I)	1
	psbE	214	72	72	CCT (P) => TCT (S)	1
	psbF	77	26	26	TCT (S) => TTT (F)	1
	rpl20	308	103	103	TCA (S) => TTA (L)	0.86
	rpoA	833	278	280	TCA (S) => TTA (L)	1
	rpoB	338	113	113	TCT (S) => TTT (F)	1
		551	184	185	TCA (S) => TTA (L)	1
		566	189	190	TCG (S) => TTG (L)	1
		1450	484	501	CCT (P) => TCT (S)	1
		2000	667	684	TCT (S) => TTT (F)	1
		2426	809	827	TCA (S) => TTA (L)	0.86
	rpoC1	41	14	14	TCA (S) => TTA (L)	1
		1447	483	500	CGT (R) => TGT (C)	1
	rpoC2	806	269	280	ACT (T) => ATT (I)	0.86
		1444	482	499	CGC (R) => TGC (C)	0.86
		1897	633	817	CCA (P) => TCA (S)	1
		2278	760	948	CGG (R) => TGG (W)	1
		2957	986	1186	ACT (T) => ATT (I)	1
		3524	1175	1385	ACT (T) => ATT (I)	0.86
	rps2	676	226	226	CGT (R) => TGT (C)	0.86
	rps14	80	27	27	TCA (S) => TTA (L)	1
		149	50	53	CCG (P) => CTG (L)	1
	rps16	229	77	77	CTT (L) => TTT (F)	1
P. smithii	Gene	Nt Pos	AA Pos	Align Col	Effect	Score	Total
	accD	74	25	26	ACG (T) => ATG (M)	1	58
		785	262	288	TCG (S) => TTG (L)	0.8
		1186	396	434	CCA (P) => TCA (S)	1
		1394	465	503	CCT (P) => CTT (L)	1
	atpA	791	264	264	CCC (P) => CTC (L)	1
	atpB	35	12	12	GCT (A) => GTT (V)	0.86
		1487	496	496	TCG (S) => TTG (L)	1
	ccsA	556	186	191	CTT (L) => TTT (F)	0.8
	matK	640	214	229	CAT (H) => TAT (Y)	1
		991	331	346	CTT (L) => TTT (F)	0.86
		1013	338	353	GCG (A) => GTG (V)	0.86
	ndhA	107	36	36	CCT (P) => CTT (L)	1
		320	107	107	ACA (T) => ATA (I)	1
		566	189	189	TCA (S) => TTA (L)	1
		1073	358	358	TCC (S) => TTC (F)	1
	ndhB	149	50	50	TCA (S) => TTA (L)	1
		467	156	156	CCA (P) => CTA (L)	1
		586	196	196	CAT (H) => TAT (Y)	1
		611	204	204	TCA (S) => TTA (L)	0.8
		737	246	246	CCA (P) => CTA (L)	1
		746	249	249	TCT (S) => TTT (F)	1
		830	277	277	TCA (S) => TTA (L)	1
		836	279	279	TCA (S) => TTA (L)	1
		902	301	301	ACC (T) => ATC (I)	1
		1481	494	494	CCA (P) => CTA (L)	1
	ndhD	2	1	1	ACG (T) => ATG (M)	1
		674	225	225	TCG (S) => TTG (L)	1
		878	293	293	TCA (S) => TTA (L)	1
		1298	433	433	TCA (S) => TTA (L)	0.8
	ndhF	290	97	97	TCA (S) => TTA (L)	1
		1772	591	597	CCT (P) => CTT (L)	0.8
		2209	737	743	CTT (L) => TTT (F)	1
	ndhG	166	56	56	CAT (H) => TAT (Y)	0.8
		314	105	105	ACA (T) => ATA (I)	0.8
	petB	418	140	140	CGG (R) => TGG (W)	1
		611	204	204	CCA (P) => CTA (L)	1
	petG	104	35	35	TCG (S) => TTG (L)	1
	psaI	104	35	51	ACT (T) => ATT (I)	1
	psbE	214	72	72	CCT (P) => TCT (S)	1
	psbF	77	26	26	TCT (S) => TTT (F)	1
	rpl20	308	103	103	TCA (S) => TTA (L)	0.86
	rpoA	833	278	280	TCA (S) => TTA (L)	1
	rpoB	338	113	113	TCT (S) => TTT (F)	1
		566	189	190	TCG (S) => TTG (L)	1
		1450	484	501	CCT (P) => TCT (S)	1
		2000	667	684	TCT (S) => TTT (F)	1
		2426	809	827	TCA (S) => TTA (L)	0.86
	rpoC1	41	14	14	TCA (S) => TTA (L)	1
		1447	483	500	CGT (R) => TGT (C)	1
	rpoC2	806	269	280	ACT (T) => ATT (I)	0.86
		1493	498	517	ACG (T) => ATG (M)	0.86
		1897	633	817	CCA (P) => TCA (S)	1
		2278	760	948	CGG (R) => TGG (W)	1
		2957	986	1186	ACT (T) => ATT (I)	1
		3524	1175	1385	ACT (T) => ATT (I)	0.86
	rps2	676	226	226	CGT (R) => TGT (C)	0.86
	rps14	80	27	27	TCA (S) => TTA (L)	1
		149	50	53	CCG (P) => CTG (L)	1
P. valleculosa	Gene	Nt Pos	AA Pos	Align Col	Effect	Score	Total
	accD	74	25	26	ACG (T) => ATG (M)	1	58
		803	268	294	TCG (S) => TTG (L)	0.8
		1412	471	509	CCT (P) => CTT (L)	1
	atpA	791	264	264	CCC (P) => CTC (L)	1
	atpB	35	12	12	GCT (A) => GTT (V)	0.86
		1487	496	496	TCG (S) => TTG (L)	1
	ccsA	556	186	191	CTT (L) => TTT (F)	0.8
	matK	640	214	229	CAT (H) => TAT (Y)	1
		991	331	346	CTT (L) => TTT (F)	0.86
		1013	338	353	GCG (A) => GTG (V)	0.86
	ndhA	107	36	36	CCT (P) => CTT (L)	1
		320	107	107	ACA (T) => ATA (I)	1
		566	189	189	TCA (S) => TTA (L)	1
		1073	358	358	TCC (S) => TTC (F)	1
	ndhB	28	10	10	CTC (L) => TTC (F)	1
		149	50	50	TCA (S) => TTA (L)	1
		467	156	156	CCA (P) => CTA (L)	1
		586	196	196	CAT (H) => TAT (Y)	1
		611	204	204	TCA (S) => TTA (L)	0.8
		737	246	246	CCA (P) => CTA (L)	1
		746	249	249	TCT (S) => TTT (F)	1
		830	277	277	TCA (S) => TTA (L)	1
		836	279	279	TCA (S) => TTA (L)	1
		902	301	301	ACC (T) => ATC (I)	1
		1481	494	494	CCA (P) => CTA (L)	1
	ndhD	2	1	1	ACG (T) => ATG (M)	1
		674	225	225	TCG (S) => TTG (L)	1
		878	293	293	TCA (S) => TTA (L)	1
		1298	433	433	TCA (S) => TTA (L)	0.8
	ndhF	290	97	97	TCA (S) => TTA (L)	1
		2209	737	743	CTT (L) => TTT (F)	1
	ndhG	166	56	56	CAT (H) => TAT (Y)	0.8
		314	105	105	ACA (T) => ATA (I)	0.8
	petB	418	140	140	CGG (R) => TGG (W)	1
		611	204	204	CCA (P) => CTA (L)	1
	petG	104	35	35	TCG (S) => TTG (L)	1
	psaI	104	35	51	ACT (T) => ATT (I)	1
	psbE	214	72	72	CCT (P) => TCT (S)	1
	psbF	77	26	26	TCT (S) => TTT (F)	1
	rpl20	308	103	103	TCA (S) => TTA (L)	0.86
	rpoA	833	278	280	TCA (S) => TTA (L)	1
	rpoB	338	113	113	TCT (S) => TTT (F)	1
		551	184	185	TCA (S) => TTA (L)	1
		566	189	190	TCG (S) => TTG (L)	1
		1450	484	501	CCT (P) => TCT (S)	1
		2000	667	684	TCT (S) => TTT (F)	1
		2426	809	827	TCA (S) => TTA (L)	0.86
	rpoC1	41	14	14	TCA (S) => TTA (L)	1
		1447	483	500	CGT (R) => TGT (C)	1
	rpoC2	806	269	280	ACT (T) => ATT (I)	0.86
		1493	498	517	ACG (T) => ATG (M)	0.86
		1897	633	817	CCA (P) => TCA (S)	1
		2278	760	948	CGG (R) => TGG (W)	1
		2963	988	1188	ACT (T) => ATT (I)	1
		3530	1177	1387	ACT (T) => ATT (I)	0.86
	rps2	676	226	226	CGT (R) => TGT (C)	0.86
	rps14	80	27	27	TCA (S) => TTA (L)	1
		149	50	53	CCG (P) => CTG (L)	1
P. rhomboidea	Gene	Nt Pos	AA Pos	Align Col	Effect	Score	Total
	accD	74	25	26	ACG (T) => ATG (M)	1	58
		800	267	293	TCG (S) => TTG (L)	0.8
		1201	401	439	CCA (P) => TCA (S)	1
		1409	470	508	CCT (P) => CTT (L)	1
	atpA	791	264	264	CCC (P) => CTC (L)	1
	atpB	1484	495	496	TCG (S) => TTG (L)	1
	matK	640	214	229	CAT (H) => TAT (Y)	1
		997	333	348	CTT (L) => TTT (F)	0.86
		1019	340	355	GCT (A) => GTT (V)	0.86
	ndhA	107	36	36	CCT (P) => CTT (L)	1
		320	107	107	ACA (T) => ATA (I)	1
		566	189	189	TCA (S) => TTA (L)	1
		1073	358	358	TCC (S) => TTC (F)	1
	ndhB	149	50	50	TCA (S) => TTA (L)	1
		467	156	156	CCA (P) => CTA (L)	1
		586	196	196	CAT (H) => TAT (Y)	1
		611	204	204	TCA (S) => TTA (L)	0.8
		737	246	246	CCA (P) => CTA (L)	1
		746	249	249	TCT (S) => TTT (F)	1
		830	277	277	TCA (S) => TTA (L)	1
		836	279	279	TCA (S) => TTA (L)	1
		902	301	301	ACC (T) => ATC (I)	1
		1481	494	494	CCA (P) => CTA (L)	1
	ndhD	2	1	1	ACG (T) => ATG (M)	1
		383	128	128	TCA (S) => TTA (L)	1
		674	225	225	TCG (S) => TTG (L)	1
		878	293	293	TCA (S) => TTA (L)	1
		887	296	296	CCT (P) => CTT (L)	1
		1298	433	433	TCA (S) => TTA (L)	0.8
	ndhF	290	97	97	TCA (S) => TTA (L)	1
		2225	742	748	TCC (S) => TTC (F)	1
	ndhG	166	56	56	CAT (H) => TAT (Y)	0.8
		314	105	105	ACA (T) => ATA (I)	0.8
	petB	418	140	140	CGG (R) => TGG (W)	1
	petG	104	35	35	TCG (S) => TTG (L)	1
	psaI	104	35	51	ACT (T) => ATT (I)	1
	psbB	287	96	96	GCG (A) => GTG (V)	1
	psbE	214	72	72	CCT (P) => TCT (S)	1
	psbF	77	26	26	TCT (S) => TTT (F)	1
	rpl20	308	103	103	TCA (S) => TTA (L)	0.86
	rpoA	833	278	280	TCA (S) => TTA (L)	1
	rpoB	338	113	113	TCT (S) => TTT (F)	1
		551	184	185	TCA (S) => TTA (L)	1
		566	189	190	TCG (S) => TTG (L)	1
		1450	484	501	CCT (P) => TCT (S)	1
		1672	558	575	CCC (P) => TCC (S)	0.86
		2000	667	684	TCT (S) => TTT (F)	1
		2426	809	827	TCA (S) => TTA (L)	0.86
	rpoC1	62	21	21	TCA (S) => TTA (L)	1
		1468	490	507	CGT (R) => TGT (C)	1
	rpoC2	1456	486	503	CGC (R) => TGC (C)	0.86
		1505	502	521	ACG (T) => ATG (M)	0.86
		1909	637	821	CCA (P) => TCA (S)	1
		2290	764	952	CGG (R) => TGG (W)	1
		3536	1179	1389	ACT (T) => ATT (I)	0.86
	rps2	266	89	89	ACA (T) => ATA (I)	0.86
	rps14	80	27	27	TCA (S) => TTA (L)	1
		149	50	53	CCG (P) => CTG (L)	1
P. purpurea	Gene	Nt Pos	AA Pos	Align Col	Effect	Score	Total
	accD	74	25	26	ACG (T) => ATG (M)	1	56
		785	262	288	TCG (S) => TTG (L)	0.8
		1186	396	434	CCA (P) => TCA (S)	1
		1394	465	503	CCT (P) => CTT (L)	1
	atpA	791	264	264	CCC (P) => CTC (L)	1
	atpB	1484	495	496	TCG (S) => TTG (L)	1
	matK	640	214	229	CAT (H) => TAT (Y)	1
		997	333	348	CTT (L) => TTT (F)	0.86
		1019	340	355	GCG (A) => GTG (V)	0.86
		1396	466	481	CTC (L) => TTC (F)	0.86
	ndhA	107	36	36	CCT (P) => CTT (L)	1
		320	107	107	ACA (T) => ATA (I)	1
		322	108	108	CCA (P) => TCA (S)	1
		566	189	189	TCA (S) => TTA (L)	1
		1073	358	358	TCC (S) => TTC (F)	1
	ndhB	149	50	50	TCA (S) => TTA (L)	1
		467	156	156	CCA (P) => CTA (L)	1
		586	196	196	CAT (H) => TAT (Y)	1
		611	204	204	TCA (S) => TTA (L)	0.8
		737	246	246	CCA (P) => CTA (L)	1
		746	249	249	TCT (S) => TTT (F)	1
		830	277	277	TCA (S) => TTA (L)	1
		836	279	279	TCA (S) => TTA (L)	1
		902	301	301	ACC (T) => ATC (I)	1
		1481	494	494	CCA (P) => CTA (L)	1
	ndhD	2	1	1	ACG (T) => ATG (M)	1
		383	128	128	TCA (S) => TTA (L)	1
		674	225	225	TCG (S) => TTG (L)	1
		878	293	293	TCA (S) => TTA (L)	1
		887	296	296	CCT (P) => CTT (L)	1
		1298	433	433	TCA (S) => TTA (L)	0.8
	ndhF	290	97	97	TCA (S) => TTA (L)	1
	ndhG	166	56	56	CAT (H) => TAT (Y)	0.8
		314	105	105	ACA (T) => ATA (I)	0.8
	petB	418	140	140	CGG (R) => TGG (W)	1
	petG	104	35	35	TCG (S) => TTG (L)	1
	psaI	104	35	51	ACT (T) => ATT (I)	1
	psbE	214	72	72	CCT (P) => TCT (S)	1
	psbF	77	26	26	TCT (S) => TTT (F)	1
	rpl20	308	103	103	TCA (S) => TTA (L)	0.86
	rpoA	833	278	280	TCA (S) => TTA (L)	1
	rpoB	338	113	113	TCT (S) => TTT (F)	1
		551	184	185	TCA (S) => TTA (L)	1
		566	189	190	TCG (S) => TTG (L)	1
		1450	484	501	CCT (P) => TCT (S)	1
		2000	667	684	TCT (S) => TTT (F)	1
		2426	809	827	TCA (S) => TTA (L)	0.86
	rpoC1	62	21	21	TCA (S) => TTA (L)	1
		1468	490	507	CGT (R) => TGT (C)	1
	rpoC2	1456	486	503	CGC (R) => TGC (C)	0.86
		1505	502	521	ACG (T) => ATG (M)	0.86
		1909	637	821	CCA (P) => TCA (S)	1
		2290	764	952	CGG (R) => TGG (W)	1
		3058	1020	1220	CTT (L) => TTT (F)	0.86
	rps14	80	27	27	TCA (S) => TTA (L)	1
		149	50	53	CCG (P) => CTG (L)	1
