# Supplementary material for: Comparative analysis of the complete plastomes of nine Pimpinella species (Apiaceae) from China
Source: PeerJ. 2023 Feb 28;11:e14773. doi: 10.7717/peerj.14773 (PMC9983424; doi:10.7717/peerj.14773)
Supplement: Table S3 [file peerj-11-14773-s003.xlsx]

## Sheet: Sheet1
Table S3. List of GenBank accession numbers of all taxa used in the phylogenetic analysis.
Angelica sylvestris	NC051890
Bupleurum boissieuanum	NC036017
B. falcatum	NC027834
B. latissimum	NC033346
Cnidium officinale	NC039760
Crithmum maritimum	NC015804
Hansenia forbesii	NC035054
H. weberbaueriana	NC035053
Haplosphaera phaea	MK801097
Peucedanum praeruptorum	MN016968
Pimpinella candolleana	ON321877
P. diversifolia	ON321878
P. purpurea	ON321879
P. rhomboidea	ON321880
P. rubescens	ON321881
P. scaberula	ON321882
P. smithii	ON321883
P. thellungiana	ON321884
P. valleculosa	ON321885
Pleurospermum camtshaticum	NC033343
Pterygopleurum neurophyllum	NC033345
Tongoloa silaifolia	MN218688
